# Supplementary material for: Repurposing CD19-directed immunotherapies for pediatric t(8;21) acute myeloid leukemia
Source: PubMed Central journal article supplement — Haematologica. 2024 Aug 8;109(12):4131–6. doi: 10.3324/haematol.2024.285707 (PMC11609786; doi:10.3324/haematol.2024.285707), 2024-08-08
Supplement: 2024_285707_BARNEH_SUPPL.pdf [file 2024_285707_BARNEH_SUPPL.pdf]

# Repurposing CD19-directed immunotherapies for pediatric t(8;21) acute myeloid leukemia

## Authors

Farnaz Barneh,<sup>1\*</sup> Joost B. Koedijk,<sup>1,2\*</sup> Noa E. Wijnen,<sup>1,3\*</sup> Tom Meulendijks,<sup>1</sup> Mino Ashtiani,<sup>1</sup> Ester Dunnebach,<sup>1,4</sup> Noël Dautzenberg,<sup>1</sup> Annelisa M. Cornel,<sup>1,4</sup> Anja Krippner-Heidenreich,<sup>1</sup> Kim Klein,<sup>1,5</sup> C. Michel Zwaan,<sup>1,2</sup> Jürgen Kuball,<sup>4</sup> Stefan Nierkens,<sup>1,4</sup> Jacqueline Cloos,<sup>6</sup> Gertjan J.L. Kaspers<sup>1,3#</sup> and Olaf Heidenreich<sup>1,7,8#</sup>

<sup>1</sup>Princess Máxima Center for Pediatric Oncology, Utrecht, the Netherlands; <sup>2</sup>Erasmus MC-Sophia Children's Hospital, Department of Pediatric Oncology, Rotterdam, the Netherlands; <sup>3</sup>Emma Children's Hospital, Amsterdam UMC, Vrije Universiteit, Department of Pediatric Oncology, Amsterdam, the Netherlands; <sup>4</sup>Center for Translational Immunology, University Medical Center Utrecht, Utrecht University, Utrecht, the Netherlands; <sup>5</sup>Wilhelmina Children's Hospital/University Medical Center, Utrecht, the Netherlands; <sup>6</sup>Department of Hematology, Amsterdam UMC, Location VUMC, Cancer Center Amsterdam, the Netherlands; <sup>7</sup>Wolfson Childhood Cancer Research Center, Translational and Clinical Research Institute, Newcastle University, Newcastle upon Tyne, UK and <sup>8</sup>University Medical Center Utrecht, Utrecht University, Utrecht, the Netherlands

\*FB, JBK and NEW contributed equally as first authors.

#GJLK and OH contributed equally as senior authors.

Correspondence:

G.J.L. KASPERS - g.j.l.kaspers@prinsesmaximacentrum.nl

O. HEIDENREICH - O.T.Heidenreich@prinsesmaximacentrum.nl

<https://doi.org/10.3324/haematol.2024.285707>

Received: April 18, 2024.

Accepted: July 30, 2024.

Early view: August 8, 2024.

©2024 Ferrata Storti Foundation

Published under a CC BY-NC license 

# Supplementary Figure 1

**A**

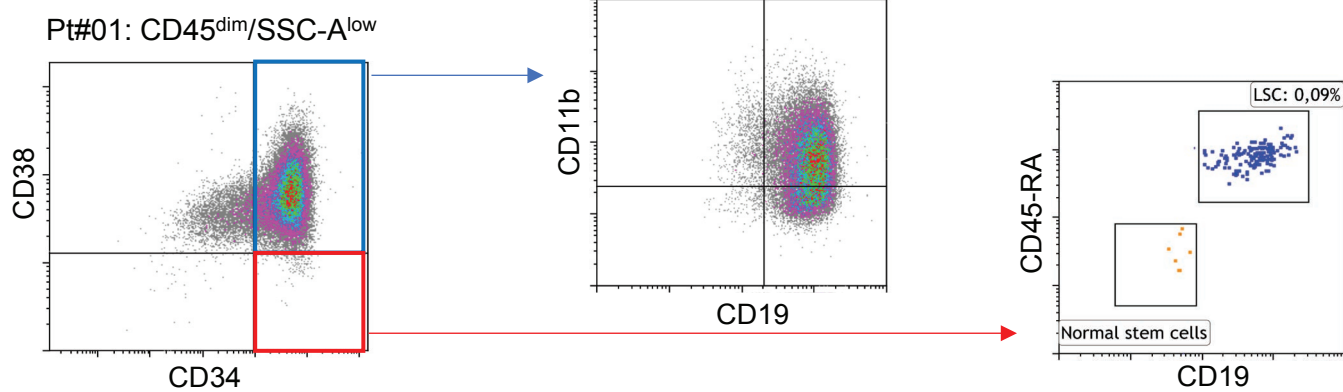

**B**

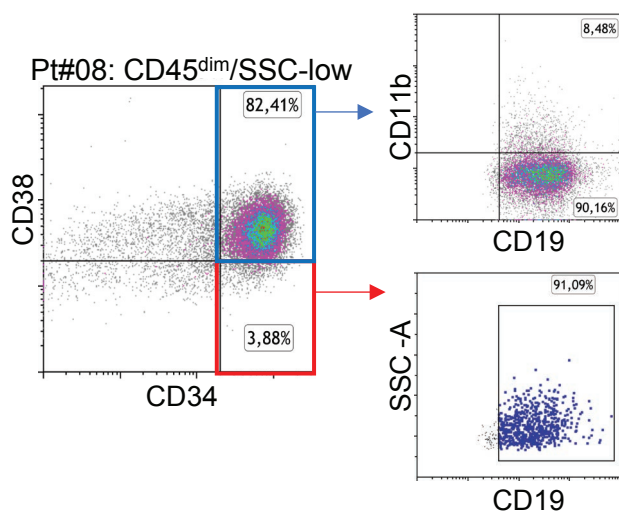

**C**

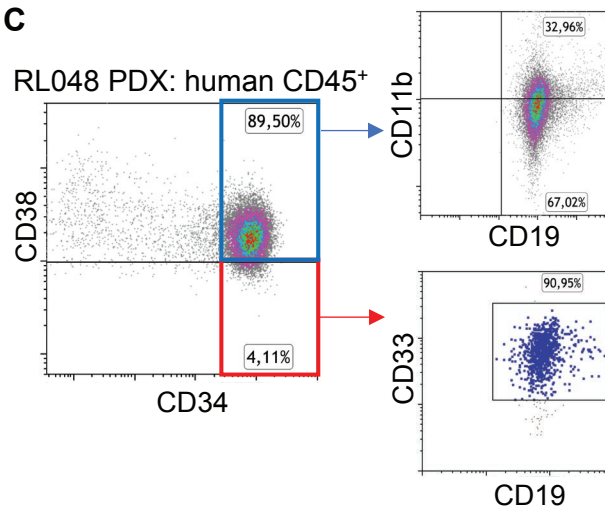

# Supplementary Figure 2

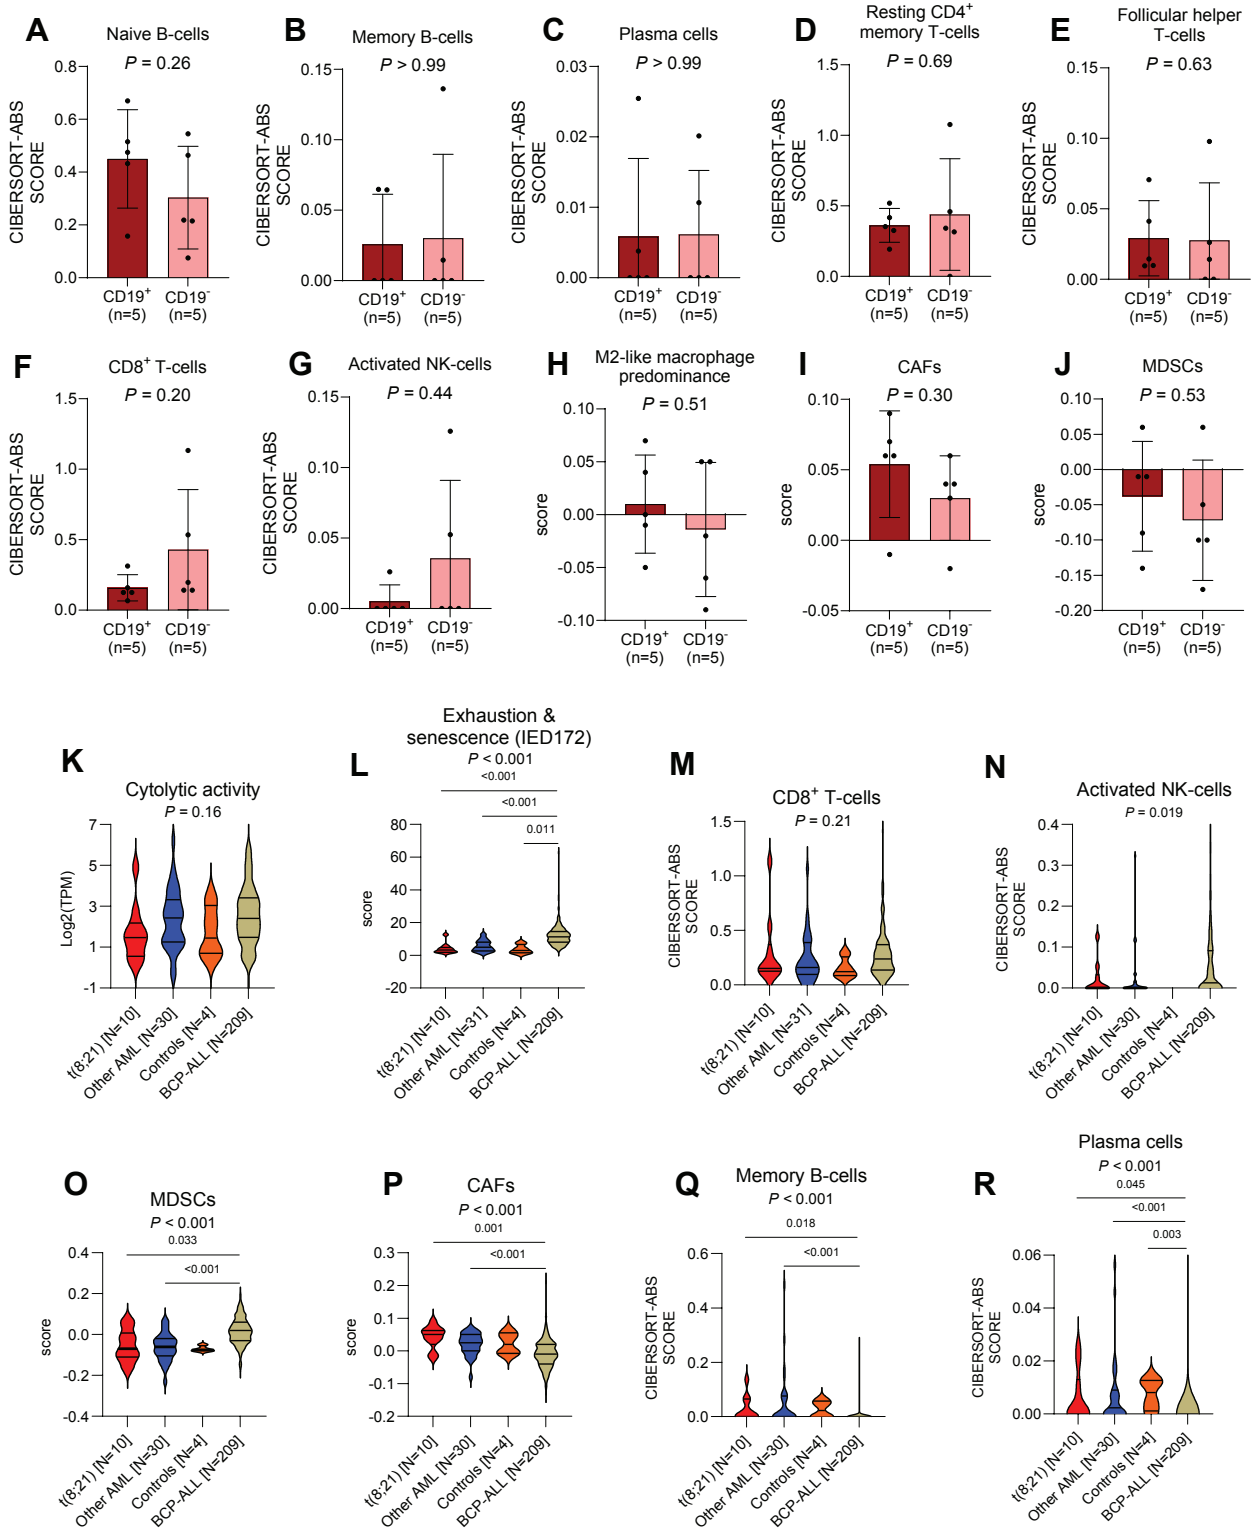

## Supplementary Figure legends

**Supplementary Figure 1. CD19-expression on AML subpopulations.** (A) CD19-expression among putative leukemic stem cells (LSCs; CD34<sup>+</sup>CD38<sup>-</sup>CD45RA<sup>+</sup>) and more mature subpopulations (CD34<sup>+</sup>CD38<sup>+</sup>CD11b<sup>+</sup>, CD34<sup>+</sup>CD38<sup>+</sup>CD11b<sup>-</sup>) from patient #01. (B) CD19-expression among CD34<sup>+</sup>CD38<sup>-</sup> and more mature subpopulations (CD34<sup>+</sup>CD38<sup>+</sup>CD11b<sup>+</sup>, CD34<sup>+</sup>CD38<sup>+</sup>CD11b<sup>-</sup>) from patient #08. (C) CD19-expression among CD34<sup>+</sup>CD38<sup>-</sup> and more mature subpopulations (CD34<sup>+</sup>CD38<sup>+</sup>CD11b<sup>+</sup>, CD34<sup>+</sup>CD38<sup>+</sup>CD11b<sup>-</sup>) from RL048 PDX cells.

**Supplementary Figure 2. Characterization of the bone marrow immune microenvironment of t(8;21) AML using immunogenomic analyses.** (A-J) Comparison of the deconvoluted absolute (ABS) abundance of various cell populations among CD19<sup>+</sup> and CD19<sup>-</sup> t(8;21) AML. Data are presented as mean with standard deviation. The Mann-Whitney test was used to test for statistical differences between groups. (K-R) Comparison of gene signature scores (cytolytic activity<sup>1</sup>: *GZMA*, *GZMB*, *PRF1*, *GNLY*, *GZMH* (K) and IED172: 172-gene immune effector dysfunction signature<sup>2</sup> (L)) and the absolute abundance of various cell populations among t(8;21) AML patients, AML patients with other cytogenetic alterations, non-leukemic controls, and BCP-ALL patients (all treatment-naïve). Data are presented as median with quartiles and range. Kruskal-Wallis test with Dunn's post-hoc test is performed for multiple comparisons. In case multiple *P* values are shown, the upper one indicates the result of the Kruskal-Wallis test and the lower one(s) the result of Dunn's test. M2-like macrophage predominance: ratio of M2- to M1-like macrophages; NK: natural killer; MDSC: myeloid-derived suppressor cell; CAF: cancer-associated fibroblast.

## References

1. Dufva O, Pölönen P, Brück O, et al. Immunogenomic landscape of hematological malignancies. *Cancer Cell* 2020;38:380-399. e13.
2. Rutella S, Vadakekolathu J, Mazziotta F, et al. Immune dysfunction signatures predict outcomes and define checkpoint blockade-unresponsive microenvironments in acute myeloid leukemia. *The Journal of Clinical Investigation* 2022;132.

(Reference 14 and 15, respectively, in the main file)
